# Supplementary material for: Boosting the photogenerated charge separation of g-C3N4 by constructing a Ni@Ni2P cocatalyst with a core–shell structure
Source: Royal Society of Chemistry journal article supplement (doi:10.1039/d2nj05014e), 2022-01-01
Supplement: d2nj05014e1.pdf [file d2nj05014e1.pdf]

## Supporting information

### **Boosting the photogenerated charge separation of g-C<sub>3</sub>N<sub>4</sub> by constructing Ni@Ni<sub>2</sub>P cocatalyst with core-shell structure**

Lingling Bi<sup>a</sup>, Xiaobo Liang<sup>\*b</sup>, Lijing Zhang<sup>\*a</sup>, Jinlong Jiang<sup>a</sup>, Tao Hu<sup>a</sup>, Nannan Wu<sup>b</sup>,  
and Tengfeng Xie<sup>c</sup>

<sup>a</sup>College of Chemical Engineering, National & Local Joint Engineering Research Center for Mineral Salt Deep Utilization, Key Laboratory for Palygorskite Science and Applied Technology of Jiangsu Province, Huaiyin Institute of Technology, Huaian, 223003, China.

<sup>b</sup>Faculty of Mechanical & Material Engineering, Jiangsu Provincial Engineering Research Center for Biomedical Materials and Advanced Medical Devices, Huaiyin Institute of Technology, Huaian, 223003, China.

<sup>c</sup>College of Chemistry, Jilin University, Changchun, 130012, China.

\*Corresponding author: [xiaoboliang@126.com](mailto:xiaoboliang@126.com), [lijingz16@hyit.edu.cn](mailto:lijingz16@hyit.edu.cn)

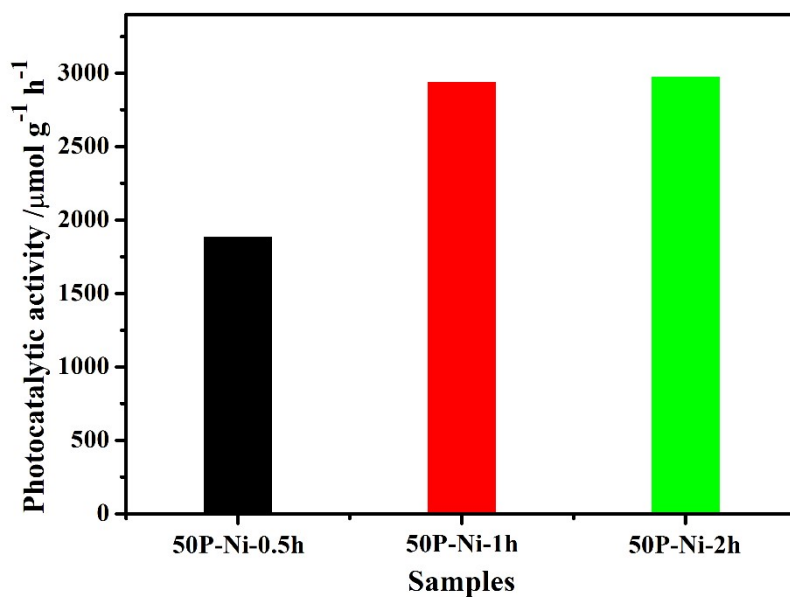

Fig. S1. Comparison of photocatalytic hydrogen evolution rate of  $\text{Ni}_2\text{P@Ni/g-C}_3\text{N}_4$  photocatalysts with different phosphating time, triethanolamine as sacrificial electron donor under 300 W Xe lamp irradiation.

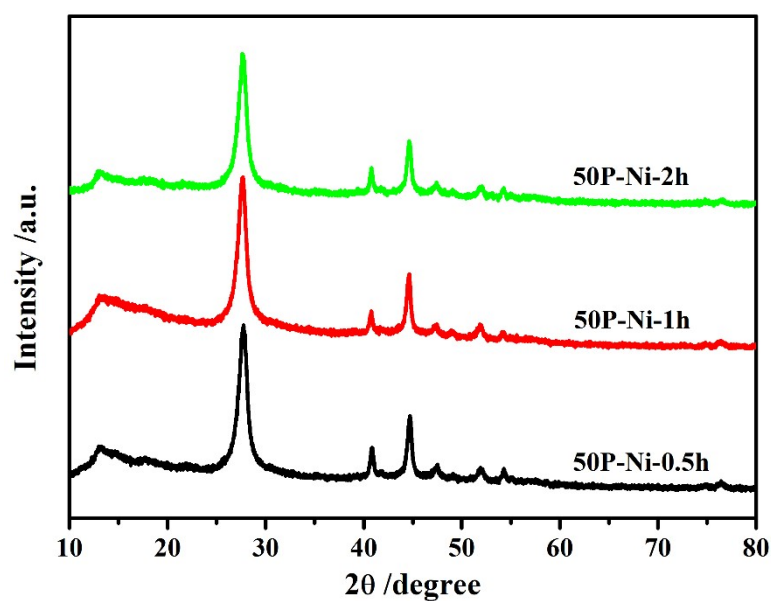

Fig. S2. XRD patterns of  $\text{Ni}_2\text{P@Ni/g-C}_3\text{N}_4$  photocatalysts with different phosphating time.

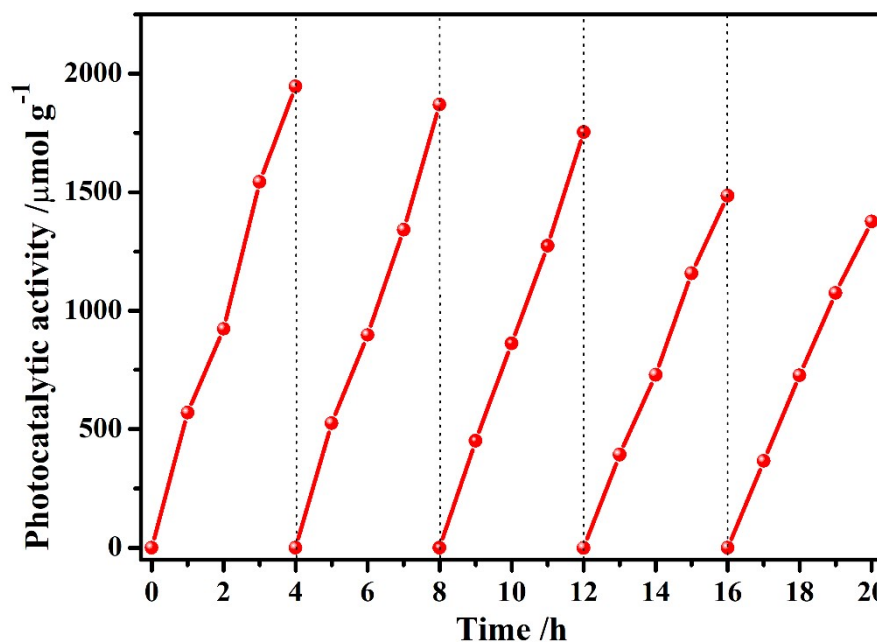

Fig. S3. The stability of photocatalytic H<sub>2</sub> performance of 50P-Ni under visible light irradiation ( $\lambda > 400$  nm).

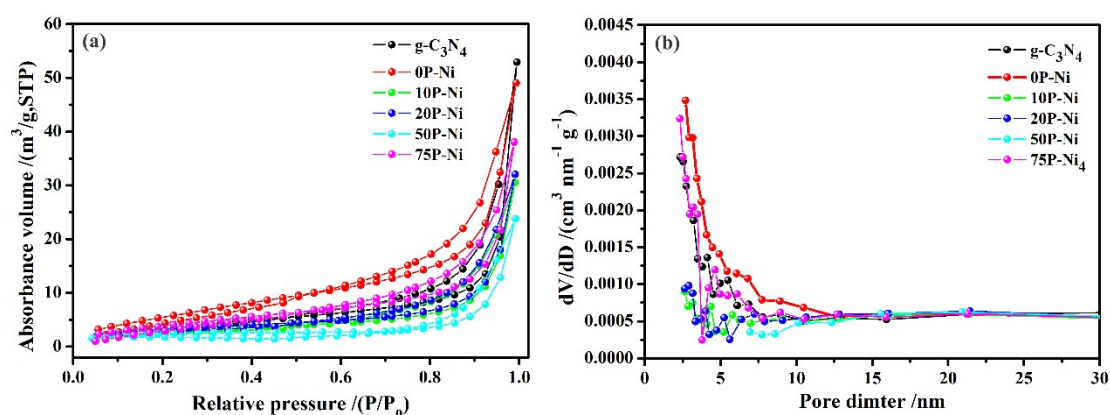

Fig. S4. Nitrogen gas sorption isotherms and pore size distribution of g-C<sub>3</sub>N<sub>4</sub>, Ni/g-C<sub>3</sub>N<sub>4</sub> and Ni@Ni<sub>2</sub>P/g-C<sub>3</sub>N<sub>4</sub> photocatalysts

**Table S1** The BET specific surface area of g-C<sub>3</sub>N<sub>4</sub>, Ni/g-C<sub>3</sub>N<sub>4</sub> and Ni@Ni<sub>2</sub>P/g-C<sub>3</sub>N<sub>4</sub> photocatalysts

| Samples                             | g-C <sub>3</sub> N <sub>4</sub> | 0P-Ni | 10P-Ni | 20P-Ni | 50P-Ni | 75P-Ni |
|-------------------------------------|---------------------------------|-------|--------|--------|--------|--------|
| BET surface area(m <sup>2</sup> /g) | 13.51                           | 23.77 | 10.19  | 10.43  | 7.72   | 15.69  |
